# Supplementary material for: Biodegradation of L-Valine Alkyl Ester Ibuprofenates by Bacterial Cultures
Source: MDPI journal article supplement (doi:10.3390/ma14123180), 2021-06-09
Supplement: s1 [file s1]

# Biodegradation of L-valine alkyl ester ibuprofenates by bacterial cultures

Edyta Makuch <sup>1</sup>, Paula Ossowicz-Rupniewska <sup>1,\*</sup>, Joanna Klebko <sup>1</sup> and Ewa Janus <sup>1</sup>

<sup>1</sup> Faculty of Chemical Technology and Engineering, Department of Chemical Organic Technology and Polymeric Materials, West Pomeranian University of Technology, Szczecin, PL-70322 Szczecin, Poland; posowicz@zut.edu.pl; emakuch@zut.edu.pl; joanna.klebko@gmail.com; ejanus@zut.edu.pl

\* Correspondence: posowicz@zut.edu.pl; Tel.: +48-91-449-48-01

**Table S1.** Biodegradation of ibuprofen and L-valine alkyl ester ibuprofenates by bacterial cultures.

| Time<br>(days)                                     | *Biodegradation after 3 cycles of tests |                       |                       |                       |                       |                       |
|----------------------------------------------------|-----------------------------------------|-----------------------|-----------------------|-----------------------|-----------------------|-----------------------|
|                                                    | IBU                                     | [ValOMe][IBU]<br>1**  | [ValOEt][IBU]<br>2**  | [ValOPr][IBU]<br>3**  | [ValOiPr][IBU]<br>3** | [ValOBu][IBU]<br>4**  |
|                                                    | (%)                                     |                       |                       |                       |                       |                       |
| 0                                                  | 0 ± 0.00                                | 0 ± 0.00              | 1 ± 1.15              | 0 ± 0.00              | 0 ± 0.00              | 0 ± 0.00              |
| 1                                                  | 4 ± 2.32                                | 9 ± 11.53             | 2 ± 1.73              | 16 ± 4.95             | 7 ± 2.00              | 5 ± 0.76              |
| 2                                                  | 9 ± 3.71                                | 26 ± 11.68            | 3 ± 1.53              | 23 ± 0.00             | 11 ± 1.00             | 14 ± 2.60             |
| 6                                                  | 16 ± 9.81                               | 47 ± 5.51             | 12 ± 6.51             | 39 ± 10.61            | 22 ± 5.51             | 25 ± 4.68             |
| 7                                                  | 18 ± 10.02                              | 49 ± 5.86             | 18 ± 3.51             | 42 ± 10.61            | 25 ± 6.51             | 27 ± 4.46             |
| 9                                                  | 23 ± 8.48                               | 52 ± 5.29             | 22 ± 0.58             | 46 ± 12.02            | 34 ± 4.58             | 34 ± 4.85             |
| 13                                                 | 28 ± 6.66                               | 59 ± 5.29             | 31 ± 1.15             | 51 ± 13.44            | 40 ± 7.57             | 36 ± 5.20             |
| 14                                                 | 30 ± 7.38                               | 63 ± 3.51             | 35 ± 1.73             | 52 ± 12.02            | 48 ± 6.08             | 38 ± 6.02             |
| 16                                                 | 43 ± 7.57                               | 73 ± 1.73             | 43 ± 1.73             | 56 ± 11.31            | 55 ± 5.03             | 40 ± 6.59             |
| 17                                                 | 43 ± 11.06                              | 77 ± 1.00             | 46 ± 4.04             | 56 ± 12.02            | 57 ± 2.31             | 43 ± 7.07             |
| 22                                                 | 54 ± 7.54                               | 86 ± 3.06             | 57 ± 6.93             | 64 ± 4.95             | 68 ± 9.29             | 45 ± 7.94             |
| 23                                                 | 58 ± 6.73                               | 88 ± 1.53             | 58 ± 5.77             | 64 ± 4.24             | 74 ± 3.46             | 49 ± 8.10             |
| 27                                                 | 65 ± 2.48                               | 94 ± 2.65             | 62 ± 1.15             | 69 ± 12.02            | 75 ± 2.65             | 57 ± 9.48             |
| 28                                                 | 65 ± 3.12                               | 95 ± 2.31             | 66 ± 0.58             | 70 ± 10.61            | 77 ± 1.00             | 60 ± 9.76             |
| Qualitative assessment of aerobic biodegradability | Readily biodegradable                   | Readily biodegradable | Readily biodegradable | Readily biodegradable | Readily biodegradable | Readily biodegradable |

\* Mean ± SD (n = 6), \*\* length of alkyl chain in ester part.

**Table S2.** Biodegradation of ibuprofen and L-valine alkyl ester ibuprofenates by bacterial cultures.

| Time (days)                                        | *Biodegradation after 3 cycles of tests |                       |                        |                       |                       |
|----------------------------------------------------|-----------------------------------------|-----------------------|------------------------|-----------------------|-----------------------|
|                                                    | [ValOAm][IBU]<br>5**                    | [ValOHex][IBU]<br>6** | [ValOHept][IBU]<br>7** | [ValOOct][IBU]<br>8** | SDS                   |
|                                                    | (%)                                     |                       |                        |                       |                       |
| 0                                                  | 0 ± 0.00                                | 0 ± 0.00              | 0 ± 0.00               | 0 ± 3.60              | 1 ± 1.50              |
| 1                                                  | 4 ± 2.12                                | 0 ± 0.02              | 0 ± 0.36               | 3 ± 1.92              | 12 ± 8.91             |
| 2                                                  | 6 ± 4.24                                | 6 ± 0.95              | 0 ± 2.27               | 5 ± 1.77              | 28 ± 10.24            |
| 6                                                  | 11 ± 9.19                               | 15 ± 2.13             | 12 ± 1.89              | 13 ± 1.23             | 49 ± 2.87             |
| 7                                                  | 15 ± 7.78                               | 18 ± 1.98             | 13 ± 1.80              | 14 ± 1.27             | 52 ± 5.06             |
| 9                                                  | 17 ± 10.61                              | 19 ± 2.82             | 18 ± 0.73              | 16 ± 5.43             | 56 ± 3.70             |
| 13                                                 | 21 ± 17.68                              | 25 ± 5.59             | 23 ± 1.85              | 26 ± 3.83             | 62 ± 3.11             |
| 14                                                 | 25 ± 12.73                              | 29 ± 7.67             | 23 ± 1.68              | 31 ± 2.70             | 67 ± 2.89             |
| 16                                                 | 30 ± 12.02                              | 48 ± 9.36             | 39 ± 3.72              | 35 ± 3.31             | 71 ± 2.22             |
| 17                                                 | 34 ± 14.14                              | 48 ± 11.03            | 39 ± 2.63              | 36 ± 5.28             | 77 ± 4.19             |
| 22                                                 | 36 ± 10.61                              | 52 ± 3.88             | 46 ± 2.14              | 37 ± 5.07             | 80 ± 6.29             |
| 23                                                 | 40 ± 7.07                               | 51 ± 4.92             | 45 ± 0.75              | 37 ± 6.74             | 80 ± 6.50             |
| 27                                                 | 58 ± 7.78                               | 55 ± 2.97             | 52 ± 1.06              | 37 ± 6.65             | 84 ± 8.85             |
| 28                                                 | 60 ± 10.61                              | 57 ± 3.39             | 54 ± 1.49              | 39 ± 5.43             | 87 ± 8.54             |
| Qualitative assessment of aerobic biodegradability | Readily biodegradable                   | Poorly biodegradable  | Poorly biodegradable   | Poorly biodegradable  | Readily biodegradable |

SDS - sodium dodecyl sulfate (reference compound),

\* Mean ± SD (n = 6), \*\* length of alkyl chain in ester part.
